# Supplementary material for: Study on Long-Term Tracing of Fibroblasts on Three-Dimensional Tissue Engineering Scaffolds Based on Graphene Quantum Dots
Source: MDPI journal article supplement (doi:10.3390/ijms231911040), 2022-09-20
Supplement: s1 [file s1]

The results of fluorescence attenuation of fibroblasts in seven days:

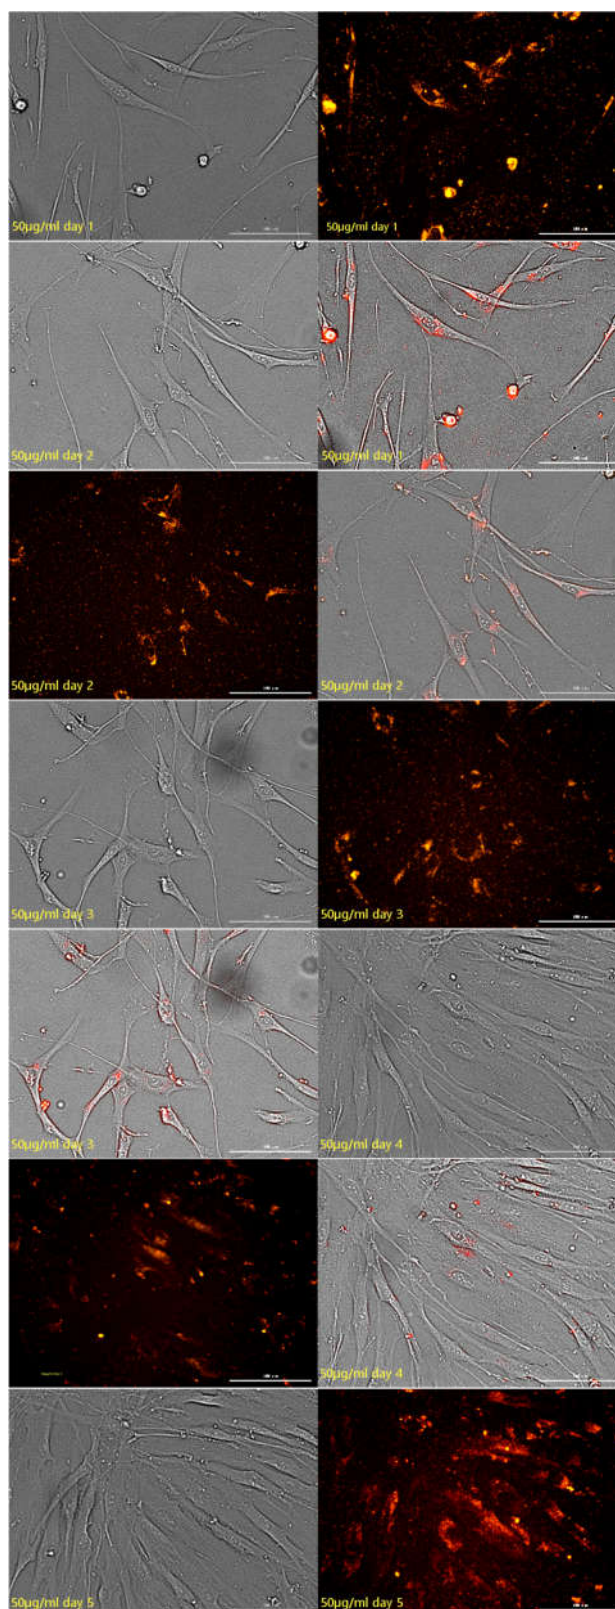

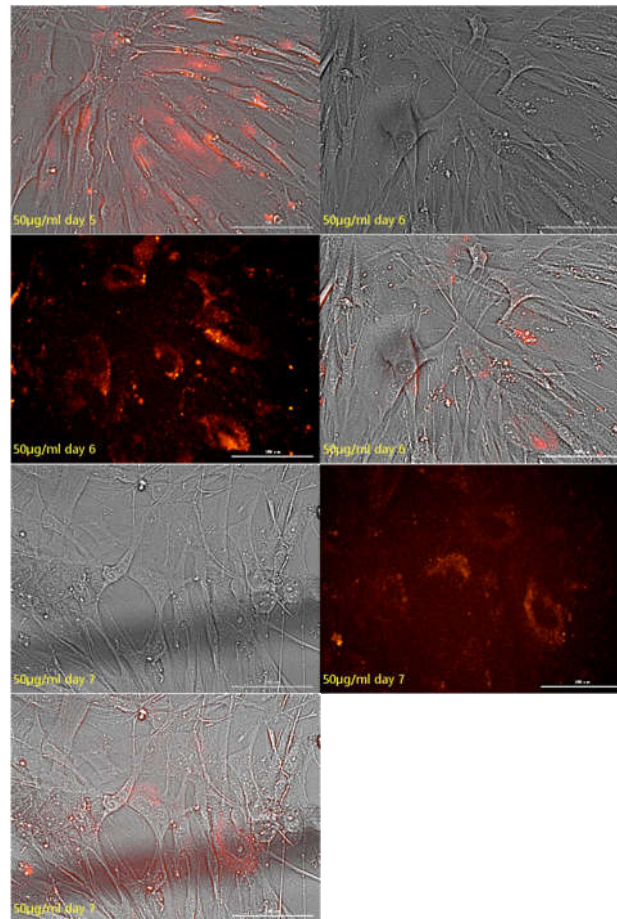

**Figure S1.** The fluorescence map from the first day to the seventh day, about 50 µg/mL AGQDs-labeled fibroblasts. From left to right, there are bright field, fluorescent field and composite pictures, respectively.

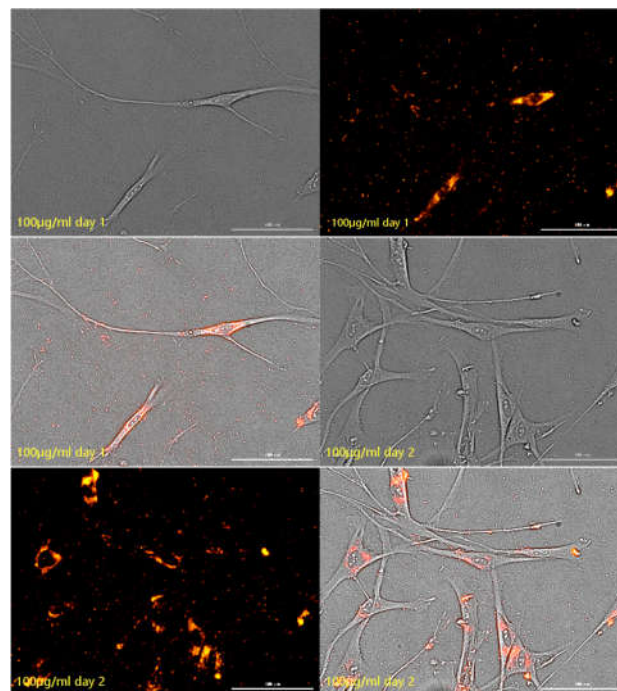

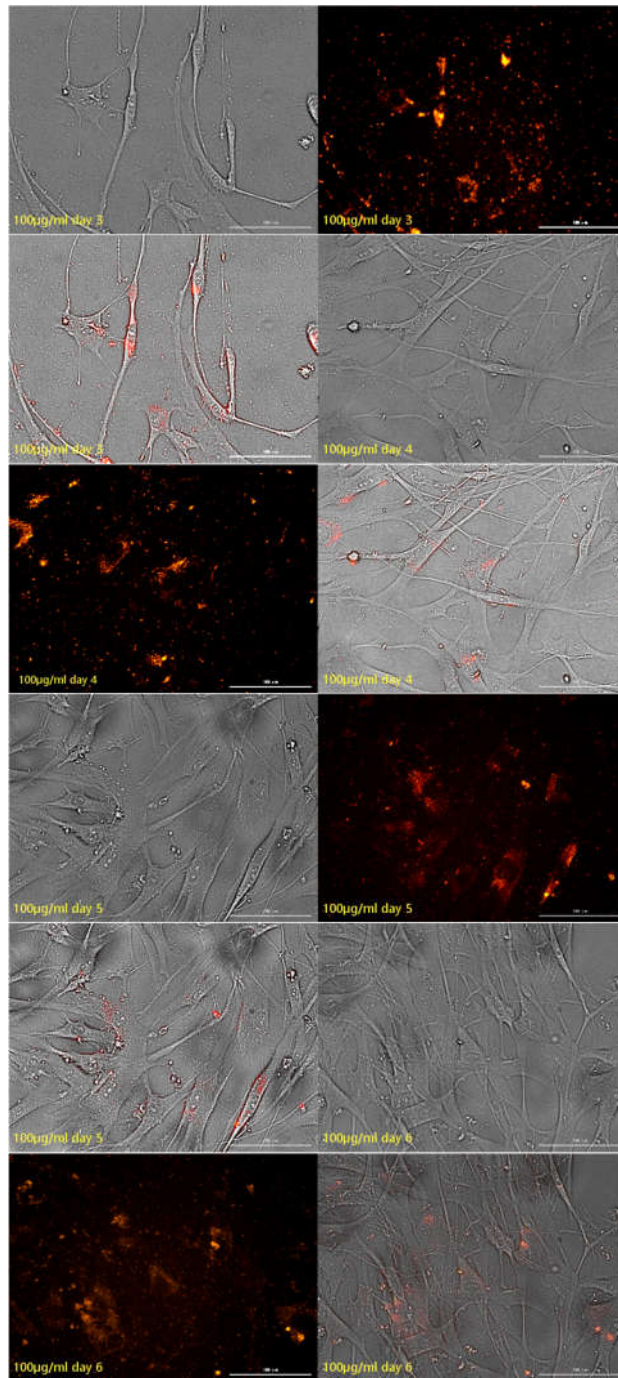



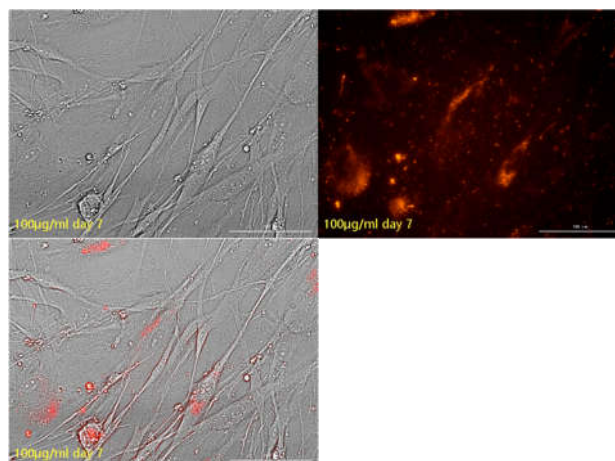

**Figure S2.** The fluorescence map from the first day to the seventh day, about 100  $\mu\text{g/mL}$  AGQDs- labeled fibroblasts,. From left to right, there are bright field, fluorescent field and composite pictures, respectively.

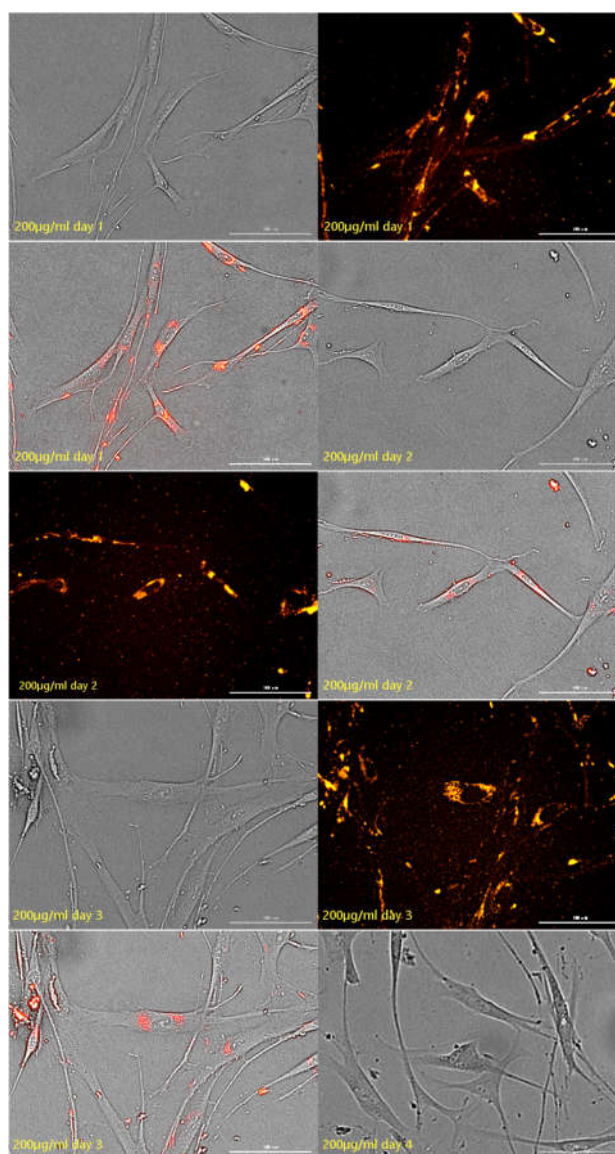

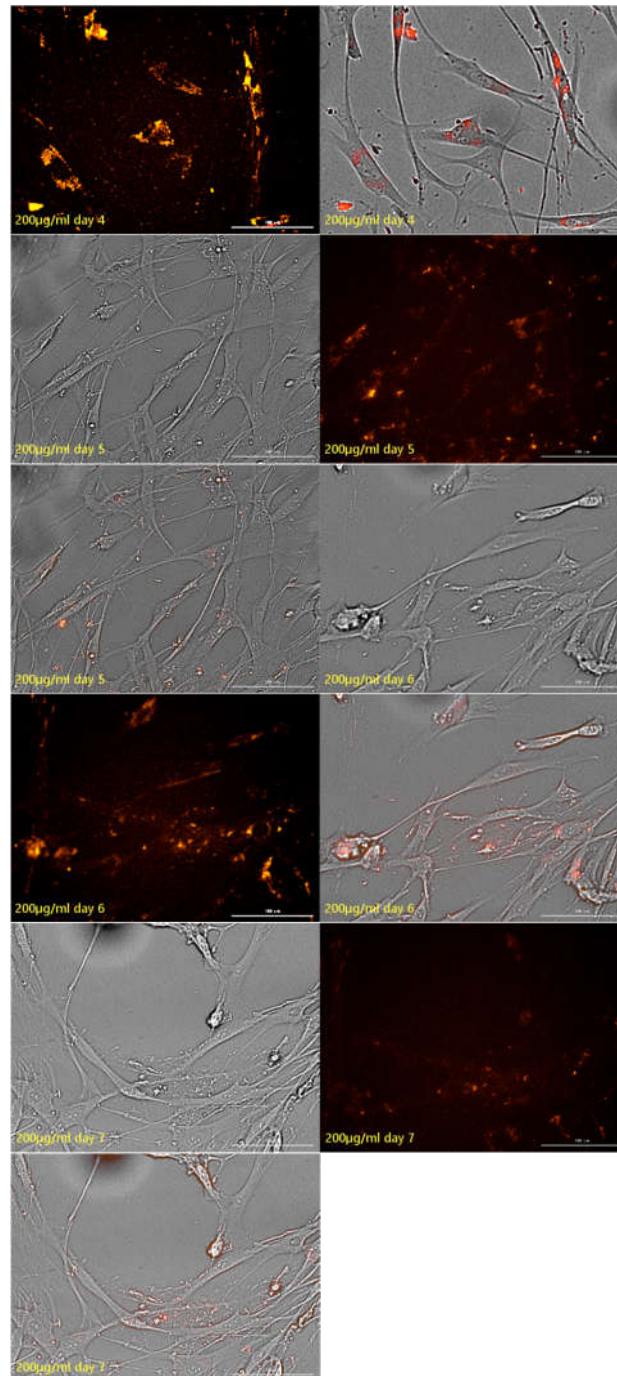

**Figure S3.** The fluorescence map from the first day to the seventh day, about 200 µg/mL AGQDs- labeled fibroblasts,. From left to right, there are bright field, fluorescent field and composite pictures, respectively.
